# Supplementary material for: A rare earth-free GaZnON phosphor prepared by combustion for white light-emitting diodes
Source: Royal Society of Chemistry journal article supplement (doi:10.1039/c4tc02615b), 2015-01-01
Supplement: c4tc02615b1.pdf [file c4tc02615b1.pdf]

## Supporting Information

### Rare Earth-Free GaZnON Phosphor Prepared by Combustion for White Light-Emitting Diodes

Neelu Chouhan,<sup>[a][b]#</sup> Chun Che Lin,<sup>[a]#</sup> Shu-Fen Hu,<sup>\*[c]</sup> and Ru-Shi Liu<sup>\*[a][d]</sup>

<sup>#</sup>These authors contributed equally

---

<sup>a</sup>Department of Chemistry, National Taiwan University  
No. 1, Sec. 4, Roosevelt Road, Taipei, 10617 Taiwan (R.O.C)  
E-mail: rslu@ntu.edu.tw

<sup>b</sup>Department of Pure and Applied Chemistry, University of Kota, Kota, Rajasthan-324005 India

<sup>c</sup>Department of Physics, National Taiwan Normal University No. 88, Sec.4, Ting-Chou Rd., Taipei  
116 Taiwan (R.O.C) E-mail: sfhu.hu@gmail.com

<sup>d</sup>Department of Mechanical Engineering and Graduate Institute of Manufacturing Technology,  
National Taipei University of Technology No. 1, Sec. 3, Zhongxiao E. Rd., Taipei, 10608 Taiwan  
(R.O.C.)

**Table S1.** Analytical EDX corresponding to HRTEM and UV/DRS studies results of GaZnON, synthesised at 300°C temperature and different time interval (1-7 h).

| <b>Sample</b>                      | <b>% Zn</b>  | <b>% Ga</b>  | <b>Ga/Zn</b> | <b>Band Gap</b> |
|------------------------------------|--------------|--------------|--------------|-----------------|
| U-1 h                              | <b>58.39</b> | <b>41.60</b> | <b>0.71</b>  | <b>3.53 eV</b>  |
| U-2 h                              | <b>40.25</b> | <b>59.74</b> | <b>1.48</b>  | <b>3.48 eV</b>  |
| U-3 h                              | <b>44.47</b> | <b>55.53</b> | <b>1.24</b>  | <b>3.22 eV</b>  |
| U-4 h                              | <b>46.62</b> | <b>53.37</b> | <b>1.14</b>  | <b>3.21 eV</b>  |
| U-5 h                              | <b>46.70</b> | <b>53.30</b> | <b>1.14</b>  | <b>3.21 eV</b>  |
| U-6 h                              | <b>46.34</b> | <b>53.65</b> | <b>1.15</b>  | <b>3.23 eV</b>  |
| U-7 h                              | <b>47.84</b> | <b>52.16</b> | <b>1.09</b>  | <b>3.20 eV</b>  |
| <b>Ga<sub>2</sub>O<sub>3</sub></b> | -            | <b>100%</b>  | -            | <b>4.40 eV</b>  |

**Table S2.** Elemental composition of GaZnON synthesised at different temperatures (200-900°C) and 1h heating, observed by HRTEM corresponding EDX.

| <b>Sample</b> | <b>Zn</b> | <b>Ga</b> | <b>Ga/Zn</b> |
|---------------|-----------|-----------|--------------|
| 200°C         | 49.4(6)   | 50.5(4)   | 1.0(2)       |
| 300°C         | 48.6(3)   | 51.3(7)   | 1.0(5)       |
| 400°C         | 41.6(6)   | 58.3(4)   | 1.4(1)       |
| 500°C         | 42.5(1)   | 57.4(9)   | 1.3(5)       |
| 550°C         | 44.8(5)   | 55.1(5)   | 1.2(2)       |
| 700°C         | 47.2(4)   | 52.7(6)   | 1.1(1)       |
| 900°C         | 48.3(4)   | 51.7(6)   | 1.0(1)       |

**Table S3.** Lattice fringes separated by a distance of 0.61 nm are also observed in the HRTEM image (Fig. 2b), which indicates that the crystal growth direction was along the reflection plane (011) and (002).

| <b>Readings</b>         | <b>Lattice distance (nm)</b> |
|-------------------------|------------------------------|
| Distance 1              | 0.67                         |
| Distance 2              | 0.65                         |
| Distance 3              | 0.60                         |
| Distance 4              | 0.60                         |
| Distance 5              | 0.60                         |
| Distance 6              | 0.61                         |
| Distance 7              | 0.57                         |
| Distance 8              | 0.64                         |
| Distance 9              | 0.60                         |
| Distance 10             | 0.60                         |
| Distance 11             | 0.64                         |
| Distance 12             | 0.61                         |
| Distance 13             | 0.57                         |
| Distance 14             | 0.64                         |
| Distance 15             | 0.58                         |
| <b>Average distance</b> | <b>0.61</b>                  |

**Table S4.** CIE parameters for GaZnON calculated using CIE 3.1 software.

| Heating time | Mode  | Ex/ eV | Peak em /ex | x      | y      | T / K | dc      | FWHM /cm |
|--------------|-------|--------|-------------|--------|--------|-------|---------|----------|
| 1 h          | Em/ex | 300    | 380/348     | 0.1491 | 0.1011 | 34367 | -       | 6.3      |
| 2 h          | Em/ex | 300    | 391/353     | 0.3359 | 0.2201 | 4360  | 8.5e-02 | 8.3      |
| 3 h          | Em/ex | 300    | 400/336     | 0.3750 | 0.2478 | 2572  | 7.1e-02 | 6.6      |
| 4 h          | Em/ex | 300    | 400/335     | 0.3640 | 0.2479 | 2884  | 6.9e-02 | 5.9      |
| 5 h          | Em/ex | 300    | 403/329     | 0.1814 | 0.2074 | 34463 | 4.3e-02 | 4.5      |
| 6 h          | Em/ex | 300    | 397/336     | 0.1798 | 0.2003 | 34463 | 4.5e-02 | 5.6      |
| 7 h          | Em/ex | 300    | 404/336     | 0.1828 | 0.2173 | 34463 | 4.2e-02 | 5.0      |

**Table S5.** Package data.

| Phosphor synthesis temp. (°C)           | chip wavelength | phosphor weight | I <sub>v</sub> (mcd) | CIE-x | CIE-y | I <sub>v</sub> (lm) | W (mW) | V <sub>f</sub> (V) |
|-----------------------------------------|-----------------|-----------------|----------------------|-------|-------|---------------------|--------|--------------------|
| 200                                     | 386 nm          | 40%             | 9.94                 | 0.217 | 0.190 | 0.021               | 0.88   | 3.28               |
| 300                                     | 394 nm          | 60%             | 8.54                 | 0.212 | 0.205 | 0.024               | 0.54   | 3.28               |
| 400                                     | 402 nm          | 60%             | 21.52                | 0.182 | 0.115 | 0.059               | 1.91   | 3.34               |
| 500                                     | 410-415 nm      | 60%             | 18.26                | 0.176 | 0.069 | 0.052               | 1.79   | 3.47               |
| Pristine Ga <sub>2</sub> O <sub>3</sub> | 426 nm          | 60%             | 44.57                | 0.171 | 0.036 | 0.123               | 3.36   | 3.17               |

**Table S6.** Quantum efficiency of GaZnON phosphors with different reaction temperature.

| <b>Reaction Temperature</b> | <b>Internal QE</b> | <b>Absorption</b> | <b>External QE</b> |
|-----------------------------|--------------------|-------------------|--------------------|
| 200°C                       | 37.5               | 77.6              | 29.1               |
| 300°C                       | 45.4               | 80.7              | 36.6               |
| 400°C                       | 40.8               | 75.9              | 31.0               |
| 500°C                       | 10.3               | 66.3              | 6.8                |

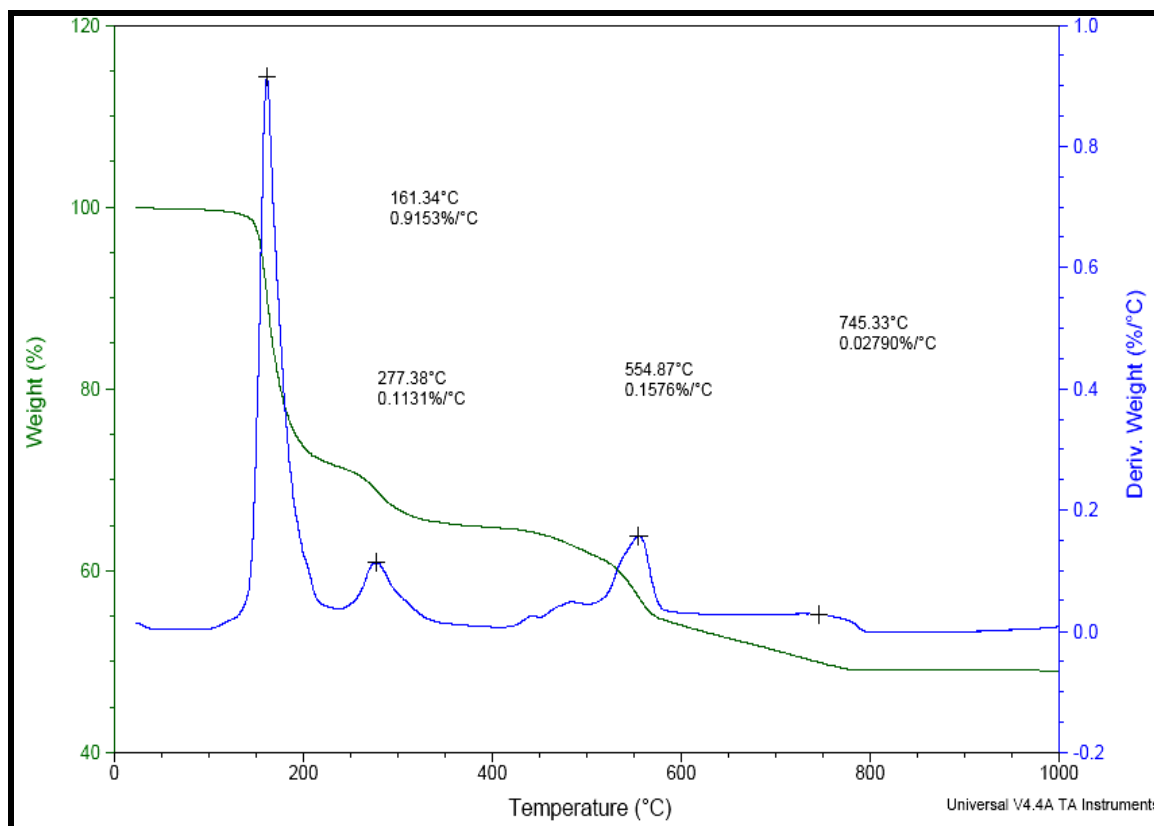

**Figure S1.** Thermo gravimetric analysis and differential scanning calorimetric plots for thermal decomposition of urea at the temperature range 0-1000°C.
